# Altered sleep intensity upon DBS to hypothalamic sleep-wake centers in rats

S. Masneuf<sup>1\*</sup>, L.L. Imbach<sup>1\*</sup>, F. Büchele<sup>1</sup>, G. Colacicco<sup>2</sup>, M. Penner<sup>1</sup>, C.G. Moreira<sup>1</sup>, C. Ineichen<sup>3</sup>, A. Jahanshahi<sup>4</sup>, Y. Temel<sup>4</sup>, C.R. Baumann<sup>1</sup>, D. Noain<sup>1,5,6,£</sup>.

<sup>1</sup>Department of Neurology, University Hospital Zurich, University of Zurich, Zurich, Switzerland.

<sup>2</sup>Institute of Anatomy, University of Zurich, Zurich, Switzerland.

<sup>3</sup>Preclinical Laboratory for Translational Research into Affective Disorders, DPPP, Psychiatric Hospital, University of Zurich, Zurich, Switzerland.

<sup>4</sup>Department of Neurosurgery, Maastricht University Medical Center, Maastricht, The Netherlands.

<sup>5</sup>Neuroscience Center Zurich (ZNZ), University of Zurich, Zurich, Switzerland.

<sup>6</sup>Center of Competence Sleep & Health, University of Zurich, Zurich, Switzerland.

\* These authors contributed equally to this work.

£ Corresponding author

E-mail: [daniela.noain@usz.ch](mailto:daniela.noain@usz.ch) (DN)

**Keywords:** deep brain stimulation, sleep-wake behavior, ventrolateral preoptic nucleus, perifornical area of the posterior lateral hypothalamus, slow-wave activity

## 24     **Abstract**

25     Deep brain stimulation (DBS) has been scarcely investigated in the field of sleep research. We  
 26     hypothesize that DBS onto hypothalamic sleep- and wake-promoting centers will produce  
 27     significant neuromodulatory effects, and potentially become a therapeutic strategy for patients  
 28     suffering severe, drug-refractory sleep-wake disturbances. We aimed to investigate whether  
 29     continuous electrical high-frequency DBS, such as that often implemented in clinical practice,  
 30     in the ventrolateral preoptic nucleus (VLPO) or the perifornical area of the posterior lateral  
 31     hypothalamus (PeFLH), significantly modulates sleep-wake characteristics and behavior. We  
 32     implanted healthy rats with electroencephalographic/electromyographic electrodes and  
 33     recorded vigilance states in parallel to bilateral bipolar stimulation of VLPO and PeFLH at  
 34     125 Hz at 90  $\mu$ A over 24 h to test the modulating effects of DBS on sleep-wake proportions,  
 35     stability and spectral power in relation to baseline. We unexpectedly found that VLPO DBS at  
 36     125 Hz deepens slow-wave sleep as measured by increased delta power, while sleep  
 37     proportions and fragmentation remain unaffected. Thus, the intensity, but not the amount of  
 38     sleep or its stability, is modulated. Similarly, the proportion and stability of vigilance states  
 39     remained altogether unaltered upon PeFLH DBS but, in contrast to VLPO, 125 Hz stimulation  
 40     unexpectedly weakened SWS, evidenced by reduced delta power. This study provides novel  
 41     insights into non-acute functional outputs of major sleep-wake centers in the rat brain in  
 42     response to electrical high-frequency stimulation, a paradigm frequently used in human DBS.  
 43     In the conditions assayed, while exerting no major effects on sleep-wake architecture,  
 44     hypothalamic high-frequency stimulation arises as a provocative sleep intensity-modulating  
 45     approach.

## 46 **Introduction**

47       The regulation of physiological sleep and wakefulness relies on the equilibrium of a  
 48 well-explored network of wake- and sleep-promoting centers in the brain. Mutual inhibition  
 49 between these centers has been proposed as main regulatory mechanism in the flip-flop switch  
 50 model [1, 2], where effective sleep requires the suppression of arousal systems by the mainly  
 51 inhibitory GABAergic ventrolateral preoptic nucleus (VLPO) in the anterior hypothalamus [3,  
 52 4], whose activation via agonism of adenosine receptors increases non-rapid eye movement  
 53 (NREM) sleep [5, 6]. Additional inhibition of wake-promoting neurons by adenosine builds  
 54 up on this neurotransmitter's sleep-promoting action [7]. As a counterpart, the perifornical  
 55 area of the posterior lateral hypothalamus (PeFLH) is densely populated, among other cell  
 56 populations, by hypocretin (orexin) neurons, implicated in the facilitation of arousal [8]. The  
 57 PeFLH region may also be an important organizer of the normal succession of stages during  
 58 the sleep-wake cycle through excitatory reciprocal feedback to monoaminergic centers  
 59 including the locus coeruleus (LC), a major arousal hub [8].

60       The complex regulation of sleep and wakefulness by counteracting and heterogeneous  
 61 hypothalamic and brainstem nuclei, including VLPO and PeFLH, has been demonstrated in  
 62 the last decades using stereotaxic injections of toxins/receptor agonists, as well as by opto-  
 63 and pharmacogenetics [9-12]. Such approaches have been very useful and successful in  
 64 specifically targeting distinct neuronal populations within heterogeneous brain areas and  
 65 modulating sleep phenotypes in animals, thus identifying the basic nature of the wake- and  
 66 sleep-controlling nuclei. However, while precise information is obtained from these  
 67 approaches when they are acutely applied, their neuromodulatory effects during long-term  
 68 (hours, days) applications have not been characterized. Additionally, this molecular approach  
 69 presents some practical limitations towards cell types and species [13], with restricted genetic  
 70 tools and inaccessibility to larger brains [14], which joins other factors such as the

irreversibility of the genetic manipulation and the unknown long-term consequences of viral expression, and potential protein accumulation, as caveats for eventual clinical applications.

Overall, clinically accessible approaches, such as electrical deep brain stimulation (DBS), have to be explored to determine whether targeting sleep-wake-controlling brain areas is a valuable therapeutic strategy offering significant neuromodulatory effects.

Here we aimed to study the effects of high frequency electrical neuromodulation of the VLPO and PeFLH nuclei, as representative sleep-wake-controlling hypothalamic targets, to determine whether these regions can serve as valuable putative therapeutic targets in further animal and human studies on the treatment of severe, drug-refractory sleep-wake disturbances. We thus tested the effect of continuous electrical high frequency stimulation (HFS, often implemented in clinical practice for reversible functional ablation of the targeted nuclei; [15]) on sleep-wake behavior, stability, and intensity as assessed by electroencephalographic/electromyographic (EEG/EMG) recordings in light, dark and 24 h periods. We hypothesize that HFS of the VLPO area will decrease NREM sleep proportion, stability, and/or intensity - by functionally inhibiting its sleep-promoting action -, whereas HFS of the PeFLH region will decrease wakefulness proportion, stability and/or intensity - by functionally disabling the arousal/wake-promoting nucleus' function -.

## Materials and methods

### Experimental design

A total of 14 animals were chronically instrumented with EEG/EMG headsets and DBS leads into the VLPO, from which 5 animals were excluded from the analysis due to histological determination of mistargeting of the DBS leads, leaving 9 available animals. In those 9 animals, we performed sleep-wake proportions, fragmentation and delta power

analyses upon HFS in light, dark and 24 h periods. For each analysis, statistical outliers, defined as cases with behavioral scores  $> 2$  standard deviations from each overall group mean, and/or animals presenting technical issues with the EEG/EMG, were additionally excluded from the analysis. Thus, for the VLPO, the remaining number of animals analyzed was  $n=7$  during the light period (1 statistical outlier and 1 technical failure in entire EEG) and  $n=6$  during the dark period (1 statistical outlier, 1 technical failure in entire EEG, and 1 technical issue during the dark period) for all parameters.

A total of 8 animals were chronically instrumented with EEG/EMG headsets and DBS leads into the PeFLH, from which 1 animal was excluded from the analysis due to histological determination of DBS leads mistargeting. In the remaining 7 animals, we analyzed sleep-wake proportions, fragmentation and delta power analyses also in light and dark periods and per 24 h. No statistical outliers were found in the analyses, whereas again we excluded one animal presenting technical issues in the entire EEG/EMG. Thus, in the PeFLH, the remaining number of animals analyzed was  $n=6$  for all parameters.

## Animals

We included adult male Sprague-Dawley rats (Charles River Laboratories International Inc, Germany) weighing between 290-380 g at the time of surgery. The rats were housed individually on a 12:12 light:dark cycle with food and water available *ad libitum* throughout the experiments. In compliance with ethical regulations and to explore potential side effects that would cause eventual protocol discontinuation, we monitored animals' weight daily while in EEG/EMG recordings/DBS sessions as well as home-cage activity after interventions. We additionally checked body temperature before and after the interventions. The animal room temperature was constantly maintained at 21-24°C. All experiments were

approved by the veterinary office of the canton of Zurich and conducted according to the local guidelines for care and use of laboratory animals under license ZH205/12.

## **Surgical procedures for EEG/EMG and DBS electrode implantation**

We anesthetized rats with isoflurane (4.5% for induction, 2.5% for maintenance) and injected them with buprenorphine (0.05 mg/kg, s.c.) for analgesia. We monitored wound healing, body weight and home-cage activity of the animals on a daily basis over the first week after surgeries and weekly thereafter.

We performed the EEG/EMG and DBS implantation procedures using adapted versions from previous established protocols [16, 17]. Briefly, we positioned the animals in a standard stereotactic apparatus (model 1900, Kopf Instruments, Tujunga, CA, USA) over a temperature-controlled pad, and made a midline incision exposing the skull. We made burr holes over the position of DBS coordinates followed by duratomy. Before insertion of the DBS electrodes, we frontally placed two anchoring screws (M1, one per hemisphere) and inserted four screws for peridural EEG recording, one pair per hemisphere over the parietal cortex. Additionally, we inserted a pair of gold wires into the rats' neck muscles, which served as EMG electrodes for monitoring muscle tone. All EEG/EMG electrodes were connected to a plug by soldering to stainless steel wires.

We implanted DBS electrodes on targets after adjustment of the initial coordinates: (i) VLPO (AP -0.04 mm, ML 0.8 mm, DV -10 mm) using a factor obtained by dividing the measured individual Bregma-Lambda distance by the reference measure from the Atlas [18], (ii) PeFLH (AP -2.9 mm, ML 1 mm; DV -9 mm) with AP -2.7 mm applied for measured Bregma-Lambda distance < 6.9 mm and AP -3.1 mm applied for measured Bregma-Lambda distance  $\geq$  6.9 mm. Finally, we cemented all headpieces to the skull as illustrated in **Fig 1**.

**Fig 1. DBS and EEG/EMG electrode implantation in rats.** (A) Scheme of the experimental set up. The animal is freely moving in its cage while connected to a swivel cable, which allows both stimulation of the targeted brain structure and recording of the sleep-wake patterns. (B) Post-surgical DBS-EEG/EMG electrode construction.

## Deep brain stimulation: hardware and characteristics

In our experimental set up, we used bilateral concentric bipolar DBS electrodes as previously described [16], stereotactically implanted into the VLPO and PeFLH. The gold-plated electrodes, composed of an inner platinum-iridium wire, functioning as the negative pole, and an outer stainless steel layer as the positive one, produce a concentrated current field around the tip of the electrode. The maximum outer diameter of the electrode is about 250  $\mu\text{m}$  with a tip diameter of approximatively 50  $\mu\text{m}$  (Technomed, Beek, The Netherlands).

We used a stimulus of rectangular shape in a current-controlled paradigm and applied a bipolar biphasic (60  $\mu\text{s}$  negative - 60  $\mu\text{s}$  positive) stimulation, which bears the advantage of potential translation into clinical studies.

## Selected DBS parameters

Based on the most commonly used parameter in the literature, we selected 125 Hz as frequency of stimulation, fixing the negative pulse width at 60  $\mu\text{s}$  as regularly used in clinical studies. We based the choice of the pulse amplitude on a priori simulations aiming at investigating the distribution of the electrical field in brain tissue [19]. We modeled the electrode position in the VLPO, as proxy structure due to its relatively small and well-defined anatomy. For this, we used the final outcome of the finite element method of modeling and simulation, a widely applied numerical technique for calculating approximate solutions of general partial differential equations [19]. The model integrated the electrode configuration

(top vs. center) and aspects of the local structure of the surrounding region. We split the region of interest into 4 quadrants and neglected overlapping effects of the resulting borders. We applied a physics controlled mesh, and set the density with an application of a spatial resolution of 1  $\mu\text{m}$  for the region close to the electrode (0 to 0.15 mm). For the distal region (0.15 mm to 10 mm), we used a spatial resolution of 10  $\mu\text{m}$ . We set tissue conductivity to 0.07 S/m (within common frequency ranges), at body temperature and of bovine origin due to lack of data for the rat [20] and the pulse width to 0.06 ms. Moreover, we accommodated for dielectric tissue properties represented by optic chiasm –och– (medial to the left VLPO) and median forebrain bundle –mfbb– (lateral to the left VLPO). We assessed the distance of mfbb and och by taking the average of two brain slices at AP level 0.00 and -0.12 mm from bregma [18] where we preferentially targeted the VLPO. We performed simulations at 40, 90 and 150  $\mu\text{A}$  and observed no summation effects (i.e. absence of rest-energy when the second pulse is applied). Accordingly, we neglected effects of frequency. To increase the comparability between the different simulations using either 40, 90 or 150  $\mu\text{A}$ , the absolute field strength (3.75 V/mm) was kept constant. The simulations were based on relative (and not absolute) electrical field strengths. The final outcome of the simulations revealed distributions of the electrical fields beyond the target-region at the three intensities of interest for both top and center configurations. Stimulation at 90 and 150  $\mu\text{A}$  would target 50 to 100% of VLPO volume, depending on the position of the electrodes (i.e. top or center). In comparison to 90  $\mu\text{A}$ , however, at 150  $\mu\text{A}$  the boundaries of the main surrounding structures (och and mfbb) would largely be affected by the stimulation. Still, even at lower intensities of stimulation, the modeling results indicate that we cannot avoid affecting, at different degrees, the surrounding structures of VLPO, predicting that targeting a specific region without any current leakage is unlikely. Thus, we chose to stimulate at 90  $\mu\text{A}$  to minimize the main leakage effects while substantially targeting the VLPO. We also chose this amplitude of stimulation for the PeFLH area, a relatively bigger area than VLPO, assuming we will be further limiting leakage effects.



195

## 196 **Experimental protocols and setup**

197         We single-housed the rats following surgery and granted a recovery of at least 2 weeks  
198 to all animals before further interventions. We connected the DBS electrodes to a stimulation  
199 device (model STG4008-1.6mA, Multi Channel Systems MCS GmbH, Reutlingen, Germany)  
200 in parallel to EEG/EMG electrodes through externalized cables that hang from a rotating  
201 swivel at the top of the cage, allowing free motion of the animals inside the experimental cage  
202 (**Fig 1**). We monitored stimulus delivery using an oscilloscope. Following a setup adaptation  
203 period of one to two days, we conducted EEG/EMG recordings for 24 h during two  
204 consecutive days, one before (DBS OFF) and one during (DBS ON) continuous bilateral  
205 electrical stimulation (**Fig 2A**).

206

207 **Fig 2. Experimental design and DBS electrodes placement.** (A) Rats were implanted with  
208 EEG/EMG electrodes and DBS headset for the recording of vigilance states and stimulation  
209 respectively, followed by a recovery period of minimum two weeks. After one to two days of  
210 adaptation, EEG/EMG recordings were performed for two consecutive days: before (DBS  
211 OFF, 24 h) and during (DBS ON, 24 h) stimulation. Animals were then sacrificed, and  
212 electrode location and tissue integrity were verified through hematoxylin-eosin staining  
213 analyses. White squares: light period; grey squares: dark period. (B) and (C) Schematic  
214 coronal sections indicating site of electrode placements in VLPO (n=9) (B) and PeFLH (n=7)  
215 (C) regions (Bregma coordinates in mm) with target outlined in black and electrode tip  
216 pointed in red. (D-G) Representative low and high-magnification micrographs illustrating  
217 electrode targeting of VLPO (D, E) and PeFLH (F, G). Scale bars represent 200  $\mu$ m in all  
218 pictures. VLPO: ventrolateral preoptic area; PeFLH: perifornical lateral hypothalamic area; X:

electrode track; aca: anterior commissure, anterior part; och: optic chiasm; f: fornix, 3V: third ventricle; mt: mamillo-thalamic tract.

## **EEG/EMG recording, scoring and analysis**

We sampled EEG and EMG at 200 Hz and amplified and processed the signals by an analog-to-digital converter. We used EMBLA hardware and Somnologica-3 software (Medcare Flaga). We discarded activity in the 50 Hz band from the analysis because of power line artifacts. We obtained power spectra of the EEG by discrete Fourier transformation (range: 0.5-100 Hz; frequency resolution: 0.25 Hz; time resolution: consecutive 4 s epochs; window function: Hanning).

We performed blinded visual scoring of acquired EEG manually as described previously [17]. We excluded artifacts by visual review of the raw data and identified and scored three vigilance states based on EEG/EMG patterns: wakefulness (WAKE), NREM sleep, and rapid eye movement (REM) sleep. We divided the 24 h scoring sessions into light and dark periods or into 1 h intervals, and assessed the proportion of the vigilance states separately for each period. To provide a quantitative measure of sleep fragmentation, we calculated the sleep fragmentation index as follows: a behavioral state bout was defined as a consecutive series of epochs in the same behavioral state without state transitions. The resulting amount of behavioral state bouts was then divided by the total number of 4 s epochs in the same sleep stage, resulting in a comparable measure for fragmentation between 0 and 1 [17, 21]. We also determined the total delta power of NREM sleep, calculated as the summarized power in the slow-wave activity (SWA) band (0.5-4 Hz), before and during stimulation. We performed all signal processing and analyses as described using MATLAB (MathWorks).

Furthermore, we analyzed the build-up of delta power (relative delta power) upon transition into consolidated NREM sleep as described earlier [22]. To this end, we identified all consolidated NREM episodes lasting longer than 6 minutes. This value was determined based on established criteria (7 minutes; [23]) and adapted empirically to ensure a significant amount of consolidated sleep bouts in the analysis (6 minutes time frame).

## Electrode placement confirmation

Upon completion of the experiments, we sacrificed the rats via intracardiac perfusion as previously described [24]. We verified correct electrode placement and visualized potential tissue damage due to the stimulation by hematoxylin-eosin stainings in coronal 40  $\mu$ m fixed brain sections (**Fig 2B-G**) [18].

## Statistical analyses

We expressed the light, dark and 24 h proportions of vigilance states, and the logarithm of delta power as medians and quartiles with 95% confidence intervals (CI), while fragmentation and data presented in 1 h intervals were plotted as means  $\pm$  S.E.M. The full spectrum EEG data were reported as absolute values. Bivariate comparison of delta power and sleep fragmentation ON vs. OFF stimulation was done by Wilcoxon's signed rank tests and Bonferroni corrections (n=4 tests). A two-way analysis of variance (ANOVA) with repeated measures (factor band - 4 levels: alpha, beta/gamma, delta, theta; factor DBS - 2 levels: OFF, ON) was used for the statistical assessment of the full spectrum EEG data for the three vigilance states and for the analysis of delta-build up in time, followed by Bonferroni post-hoc tests as appropriate. One-way ANOVA with repeated measures (factor: hour - 24 levels: 12 hours OFF vs. ON) was additionally applied within each light and dark periods, for the detailed analysis of the time course of the vigilance states and delta power, followed by

Student-Newman-Keuls post-hoc tests as appropriate. We used a threshold for statistical significance of  $P \leq 0.05$ . We performed all statistical analyses using StatView® (SAS Institute Inc., USA) and R (Team).

## Results

### No distinct side effects or tissue damage upon DBS

Importantly, we did not observe side effects in respect to body weight, body temperature, and/or overall home cage behavior (data not shown) in association with our interventions. Evaluation of hematoxylin-eosin staining revealed no significant tissue damage, besides the electrode tracks, in or around the target structures (**Fig 2**).

### DBS modulation effect on sleep-wake behavior and stability

Detailed analysis of the 24 h time course of the vigilance states in 1 h data intervals did not reveal specific time windows of neither VLPO (**Fig 3A**) nor PeFLH (**Fig 3B**) DBS effects for WAKE (VLPO, light period:  $F(23,138) = 4.46$ ,  $P < 0.0001$ ; dark period:  $F(23, 115) = 2.72$ ,  $P = 0.0002$ ; followed by non-significant Student-Newman-Keuls post-hoc comparisons; PeFLH, light period:  $F(23, 115) = 2.26$ ,  $P = 0.0025$ ; dark period:  $F(23, 115) = 4.61$ ,  $P < 0.0001$ ; followed by non-significant Student-Newman-Keuls post-hoc comparisons), NREM sleep (VLPO, light period:  $F(23,138) = 3.79$ ,  $P < 0.0001$ ; dark period:  $F(23,115) = 2.65$ ,  $P = 0.0004$ ; followed by non-significant Student-Newman-Keuls post-hoc comparisons; PeFLH, light period:  $F(23, 115) = 2.11$ ,  $P = 0.0052$ ; dark period:  $F(23, 115) = 4.16$ ,  $P < 0.0001$ ; followed by non-significant Student-Newman-Keuls post-hoc comparisons), and REM sleep (VLPO, light period:  $F(23,138) = 3.79$ ,  $P < 0.0001$ ; dark period:  $F(23,115) = 2.26$ ,

P = 0.0026; followed by non-significant Student-Newman-Keuls post-hoc comparisons; PeFLH, light period:  $F(23, 115) = 2.28$ ,  $P = 0.0023$ ; dark period:  $F(23, 115) = 4.71$ ,  $P < 0.0001$ ; followed by non-significant Student-Newman-Keuls post-hoc comparisons). We additionally corroborated no significant changes in light, dark and per 24 h sleep-wake proportions upon HFS in either VLPO (**Fig 3C**) or PeFLH (**Fig 3D**). Stability of sleep-wake behavior - as calculated by the index of fragmentation in both dark and light periods for all three vigilance states - was also unaltered upon VLPO (**Fig 4A**) and PeFLH (**Fig 4B**) HFS.

**Fig 3. Effect of VLPO and PeFLH HFS on vigilance state proportions.** (A-B) No changes in the hourly proportions of vigilance states nor in the (C-D) light, dark or total 24 h periods, when comparing data before (DBS OFF) and during (DBS ON) 125 Hz stimulation of VLPO (A-C) and PeFLH (B-D). Vigilance state proportions data are expressed as medians and quartiles with 95% CI. Data in 1 h intervals are means  $\pm$  S.E.M. Wilcoxon's signed rank tests and Bonferroni corrections. One-way repeated measures ANOVA followed by Student-Newman-Keuls tests.  $n=6-7$  per group. Two statistical outliers (criteria: scores  $> 2$  standard deviations; 1 for the analysis of the light period and 1 for the analysis of the dark period) were excluded from the analysis. WAKE: wakefulness, NREM: non-rapid eye movement sleep, REM: rapid eye movement sleep; min: minutes.

**Fig 4. Effect of VLPO and PeFLH HFS on sleep fragmentation index.** Behavioral state stability was maintained as represented by the absence of changes in the fragmentation index, when comparing data before (DBS OFF) and during (DBS ON) stimulation of VLPO (A) and PeFLH (B). Fragmentation index data are expressed as means  $\pm$  S.E.M. Wilcoxon's signed rank tests and Bonferroni corrections.  $n=6-7$  per group. Two statistical outliers (criteria: scores  $> 2$  standard deviations; 1 for the analysis of the light period and 1 for the analysis of

the dark period) were excluded from the analysis. WAKE: wakefulness, NREM: non-rapid eye movement sleep, REM: rapid eye movement sleep.

## DBS modulation effect on sleep intensity

Following no changes in sleep-wake behavioral patterns and along the hypothesis that DBS could alternatively have specifically modulated intensity of sleep, we further analyzed temporal changes of delta power (i.e. density in the delta frequency band during high amplitude low-frequency oscillatory activity, which mirrors sleep depth [25]) in NREM sleep in DBS OFF *vs.* ON conditions for both targets. This analysis revealed a significant average increase of 36% in the average delta power in NREM sleep per 24 h (36.4%,  $P < 0.05$ , Wilcoxon's signed rank tests and Bonferroni corrections; **Fig 5A**) upon VLPO 125 Hz DBS on the ON condition, as compared to DBS OFF. On the other hand, PeFLH 125 Hz DBS induced a significant average decrease of 30% in the average delta power in NREM sleep per 24 h (30.4%,  $P < 0.05$ , Wilcoxon's signed rank tests and Bonferroni corrections; **Fig 5B**).

To get more insights into the 24 h time course of delta power changes at HFS, we analyzed the measure in 1 h intervals during both light and dark periods. No specific time windows during the light or dark periods of neither VLPO (**Fig 5C**) nor PeFLH (**Fig 5D**) DBS effects were detected (one-way repeated measures ANOVAs followed by non-significant Student-Newman-Keuls post-hoc comparisons as appropriate;  $P > 0.05$ ).

To further explore the effect of VLPO and PeFLH HFS on sleep intensity dynamics [23], we calculated the build-up of delta power during consolidated NREM episodes ( $\geq 6$  minutes; **Fig 5E, F**). We observed no significant effect from neither VLPO nor PeFLH stimulation on delta power build-up over consolidated sleep (two-way repeated measures ANOVA,  $P > 0.05$ ), indicating that changes in delta power were global and not related to its dynamics.

341

342 **Fig 5. Effect of VLPO and PeFLH HFS modulation on delta power and delta power**  
 343 **dynamics during NREM sleep.** (A) Delta power increased during the 24 h period of  
 344 recording upon stimulation of VLPO at 125 Hz and decreased (B) upon 125 Hz PeFLH  
 345 stimulation as compared to DBS OFF condition. (C-D) The time course of delta power  
 346 presented in 1 h intervals for 24 h showed no significant effects of DBS at 125 Hz within  
 347 either VLPO (C) or PeFLH (D) at any time windows, nor during the light or the dark periods  
 348 as a whole. (E) Neither VLPO nor (F) PeFLH DBS affected the build-up of delta power in  
 349 consolidated,  $\geq 6$  minutes, NREM episodes. The logarithm of delta power is expressed as  
 350 medians and quartiles with 95% CI. Wilcoxon's signed rank tests and Bonferroni corrections.  
 351 Data in 1 h intervals are means  $\pm$  S.E.M. \*  $P < 0.05$  DBS ON vs. DBS OFF. One-way  
 352 repeated measures ANOVA followed by Student-Newman-Keuls tests. Delta power is  
 353 reported as absolute values. Two-way repeated measures ANOVA followed by Bonferroni  
 354 tests. n=6-7 per group. Two statistical outliers (criteria: scores  $> 2$  standard deviations; 1 for  
 355 the analysis of the light period and 1 for the analysis of the dark period) were excluded from  
 356 the analysis. Min: minutes; VLPO: ventrolateral preoptic area; PeFLH: perifornical lateral  
 357 hypothalamic area.

358

359 We further explored alterations in the 24 h average full EEG spectrum upon HFS in  
 360 both target regions, for which we calculated EEG power spectra OFF vs. ON stimulation for  
 361 all 3 vigilance states (**Fig 6**). Despite some variability observed in the EEG spectrum, notably  
 362 in the delta activity of WAKE, multiple bivariate comparisons for all frequency bands (delta,  
 363 theta, alpha, beta/gamma) did not reveal significant band-specific changes upon HFS (two-  
 364 way ANOVA with repeated measures followed by Bonferroni post-hoc comparisons as  
 365 appropriate,  $P > 0.05$ ).

366

## **Fig 6. Effect of VLPO and PeFLH DBS on 24 h spectral power in each behavioral state.**

(A) 24 h average spectral power in the EEG during WAKE (top panels), NREM (middle panels) and REM (bottom panels) states upon high-frequency VLPO, or (B) PeFLH stimulation. No band-specific effect between DBS and any frequency band were noted. Two-way ANOVA with repeated measures followed by Bonferroni post-hoc comparisons. WAKE: wakefulness, NREM: non-rapid eye movement sleep, REM: rapid eye movement sleep; Hz: hertz; VLPO: ventrolateral preoptic area; PeFLH: perifornical lateral hypothalamic area.

Overall, HFS of VLPO increased delta power, whereas HFS of PeFLH decreased delta power over light and dark periods of recordings.

## **Discussion**

In this report, we investigated the direct effects over sleep-wake behavior and characteristics of high frequency DBS on sleep- and wake-controlling centers in healthy animals. Our findings suggest that 24 h DBS of the VLPO at 125 Hz modulates sleep-wake characteristics mainly by deepening slow-wave sleep (SWS) as measured by an increase in delta power (36%), while sleep architecture and fragmentation remain unaffected. In other words, the intensity but not the amount of sleep or its stability is enhanced. Similarly, the proportion of vigilance states remained unchanged during 24 h DBS of the wake-promoting PeFLH region but, in contrast to VLPO, stimulation at 125 Hz depressed delta power (30%), weakening SWS. Furthermore, sleep microstructure, as measured by delta build-up over time, was unchanged upon DBS in both targets. Moreover, based on the marked, yet non-significant effect on delta activity upon VLPO DBS, we cannot rule out a behavioral state-specific effect on SWA selectively in wakefulness. This would indicate that VLPO DBS might have a sleep-inducing rather than a sleep-enhancing effect, by acting more on the sleep-inducing



permissive neurons rather than on the sleep-maintenance executive neurons [26]. However, due to the small effect and sample size these conclusions remain speculative. The negative results of the detailed spectral power analysis in each behavioral state and the build-up analysis of delta power during consolidated SWS (or NREM) episodes, demonstrated that DBS-elicited changes were global in nature, not affecting sleep intensity dynamics.

## **Electrical neuromodulation of VLPO and PeFLH areas**

The VLPO has been reported to present a low frequency intrinsic firing pattern of ~10 Hz [27]. Thus, finding increased delta power during NREM sleep with HFS in the VLPO was rather unexpected, given that HFS is empirically known to produce a functional inhibition of the target nucleus. However, this initial oversimplification has been actively disputed, and HFS appears to rely on more complex and multifactorial mechanisms [15, 28, 29]. DBS may notably reduce cellular activity while concurrently exciting the axons of the stimulated neurons, which was shown in both humans and animals [30-32]. Interestingly, excitatory stimulation (i.e. increased output) in parts of the basal ganglia in non-human primates at HFS has shown to excite both glutamatergic [33] and GABAergic [34] efferent neurons. Therefore, it is conceivable that the cell bodies of the VLPO neurons were inhibited by DBS while the output from this GABAergic nucleus increased simultaneously, inhibiting the downstream arousal systems.

VLPO sleep-active neurons have also been shown to progressively increase their firing rate along with sleep depth in rats [35]. The increased intensity of SWS of about 36% upon HFS revealed in our experiments may thus rely on this neurophysiological property. Indeed, HFS could further increase the discharge rate of VLPO sleep-active neurons, based on the synchronization of the target neuronal firing to the stimulus frequency as shown in other nuclei [33], and consequently increase the depth of sleep, as observed in this study.

417

418 PeFLH HFS, on the other hand, decreased delta power during NREM sleep by  
 419 approximately 30%, suggesting an excitatory effect of HFS on this wake-promoting region.  
 420 Once more, the apparent activation of the PeFLH region at, supposedly inhibitory, HFS is  
 421 unexpected. Nevertheless, activation of the tuberomammillary nucleus (TMN), a neighboring  
 422 wake-promoting target with similar firing rates to PeFLH arousal-related neurons, upon HFS  
 423 (100 Hz) has been already demonstrated in rodents [36]. Moreover, the PeFLH is crossed by  
 424 the mfb, carrying projections from groups of neurons critical for sleep-wake control [37],  
 425 which unintended stimulation could additionally compound in the observed effects. Although  
 426 the exact neurophysiological mechanisms sustaining these results remain speculative,  
 427 comparable processes (i.e. activation of neuronal processes rather than cell soma) in VLPO  
 428 and PeFLH regions may have been involved, increasing the output of these simplistically  
 429 regarded sleep- and wake-promoting regions by excitation of efferent neurons.

430 Noteworthy, however, a decrease in SWA has been previously observed by electrical  
 431 stimulation of the PeFLH neurons [8]. The delivery of trains of electrical stimuli at 50 Hz in  
 432 the PeFLH area of anesthetized rats increased the mean firing rate of LC neurons and induced  
 433 an activation of the EEG shown by a decrease in the proportion of delta waves together with  
 434 an increased percentage of faster ( $> 4$  Hz) waves. This result, although obtained under  
 435 anesthesia as opposed to our awake, freely-moving rats, reveals a direct role of the PeFLH  
 436 neurons in the modulation of delta power, in line with our findings.

437

438 **Lack of behavioral modulation with VLPO and PeFLH DBS: potential**  
 439 **compensatory mechanisms**

Although VLPO is an important sleep-promoting center and PeFLH an organizer of wakefulness/sleep stages, the electrical modulation of these regions did not change the proportions of sleep-wake stages, nor the fragmentation of behavioral states in response to HFS. In this line, we cannot exclude a possible DBS effect on regions neighboring VLPO, predominantly populated by wake-active cells in the lateral preoptic / anterior hypothalamic area [35], and/or on the main monoaminergic arousal projections from LC, raphe nuclei and TMN to VLPO, which could counteract the effect of the stimulation on VLPO sleep-active neurons.

Similarly, we cannot exclude the activation of the main inhibitory afferents (i.e. VLPO and median preoptic nucleus) to the PeFLH region upon DBS that could have counterbalanced the stimulatory effects of this conceptualized wake-promoting area. Also, stimulation of a sub-population within the heterogeneous PeFLH, the melanin-concentrating hormone (MCH) neurons, known to promote sleep [38], might have played a role. Indeed, these neurons - electrically silent in the absence of synaptic activity - show pronounced firing at 100 Hz upon brief repeated current injections in rodent brain slices [39, 40]. Strikingly, application of high levels of orexin peptides excited some MCH neurons in vitro [41]. In this context, possible over-excitation of orexin neurons by electrical stimulation may have in turn stimulated MCH neurons as a feedback mechanism to prevent hyperarousal and, consequently, overall changes in sleep-wake amounts.

## Limitations

The most challenging part of any DBS study is identifying the optimal combination of parameters producing a targeted effect while limiting side effects, for which the lack of conclusive dose-response assessments for each parameter analyzed (frequency, intensity, duration) is one of the main limitations of our study. Also, despite the use of bipolar

electrodes producing a concentrated current around the tip of the electrodes, our study expectedly suffers from a fundamental DBS limitation which, unlike other highly specific approaches such as optogenetics [42], lacks selectivity between the activation of local cells and that of passing axons using conventional symmetrical biphasic pulses, as illustrated in computational models with monopolar electrodes [43]. Additionally, cell heterogeneity within a target constitutes an intrinsic biological limitation of DBS. For instance, electrical stimulation of PeFLH, whose activation has been shown to produce changes at feeding and motor activity [44], could have additionally affected another sub-population besides the wake-promoting hypocretin neurons, such as MCH neurons, known to discharge in a reciprocal manner to orexin neurons across the sleep-wake cycle [45, 46] and promote sleep [38]. Nevertheless, DBS remains to be a preferred tool of clinical choice, as opposed to approaches involving invasive mutagenic and viral strategies. For this, its exploration remains remarkably important in the context of the search for new therapeutic targets.

A limitation of technical nature is the use of a relatively short pulse width in our study. Longer pulse widths (in the range of milliseconds) could be used in the future to preferentially stimulate the cell bodies of our targets [47]. However, increasing the pulse width would also increase the charge density (i.e. the amount of electrical charge per surface area) accumulated per pulse, thus potentially reaching safety limits and causing tissue lesions, which we avoided in our study.

## Conclusions

Our investigation has provided new insights into DBS modulation of important centers of the sleep-wake-regulating network. In summary, our unexpected results suggest that tight compensatory mechanisms counteracted the intended changes in sleep-wake behavior in our healthy rats. However, escaping the tight regulatory controls, sleep intensity is specifically –

but contrary to predicted – modulated by hypothalamic DBS, shining light on non-acute neuromodulation outputs of hypothalamic high frequency electrical stimulation. Overall, although our results indicate that clinical implementation of HFS in hypothalamic centers for the treatment of disabling sleep-wake behavior disorders should eventually be explored with utmost caution, they encourage new avenues of research intended to further explore and understand the findings for instance by means of implementation of hypothalamic HFS in animal models of sleep-wake disorders.

**Acknowledgments:** We thank Dr. O. Sürücü for contribution to study concept and Mr. T. Provini and Dr. I. Amrein for technical support.

**Research funding:** This work was supported by the HSM-II program of the Canton of Zurich (CRB), by the Forschungskredit of the University of Zurich (DN), and by the Clinical Research Priority Program Sleep and Health of the University of Zurich (CRB).

**Conflict of interest:** Authors state no conflict of interest.

**Data availability statement:** The datasets generated during and/or analyzed during the current study are available from the corresponding author on reasonable request.

## References

[1] Saper CB, Scammell TE, Lu J. Hypothalamic regulation of sleep and circadian rhythms. *Nature*, 2005 Oct, 437(7063):1257-1263. ISSN 1476-4687 (Electronic) 0028-0836 (Linking). Available at: < <https://www.ncbi.nlm.nih.gov/pubmed/16251950> >.

514

515 [2] Saper CB. The neurobiology of sleep. Continuum (Minneap Minn), 2013 Feb, 19(1):19-31. ISSN

516 1538-6899 (Electronic)

517 1080-2371 (Linking). Available at: < <https://www.ncbi.nlm.nih.gov/pubmed/23385692> >.

518

519 [3] Baumann CR, Bassetti CL. Hypocretins (orexins) and sleep-wake disorders. Lancet Neurol, 2005

520 Oct, 4(10):673-682. ISSN 1474-4422 (Print)

521 1474-4422 (Linking). Available at: < <https://www.ncbi.nlm.nih.gov/pubmed/16168936> >.

522

523 [4] Scammell TE, Arrigoni E, Lipton JO. Neural Circuitry of Wakefulness and Sleep. Neuron, 2017,

524 93(4):747-765. DOI: 10.1016/j.neuron.2017.01.014.

525 Available at: < <https://pubmed.ncbi.nlm.nih.gov/28231463> >.

526

527 [5] Scammell T, Gerashchenko D, Urade Y, Onoe H, Saper C, Hayaishi O. Activation of ventrolateral

528 preoptic neurons by the somnogen prostaglandin D2. Proceedings of the National Academy of

529 Sciences, 1998, 95(13):7754-7759. ISSN 0027-8424.

530 Available at: < <https://pubmed.ncbi.nlm.nih.gov/9636223/> >.

531

532 [6] Scammell TE, Gerashchenko DY, Mochizuki T, McCarthy MT, Estabrooke IV, Sears CA, et al. An

533 adenosine A2a agonist increases sleep and induces Fos in ventrolateral preoptic neurons.

534 Neuroscience, 2001, 107(4):653-663. ISSN 0306-4522 (Print)

535 0306-4522 (Linking). Available at: < <https://www.ncbi.nlm.nih.gov/pubmed/11720788> >.

536

537 [7] Strecker RE, Morairty S, Thakkar MM, Porkka-Heiskanen T, Basheer R, Dauphin LJ, et al.

538 Adenosinergic modulation of basal forebrain and preoptic/anterior hypothalamic neuronal activity in

539 the control of behavioral state. Behavioural Brain Research, 2000, 115(2):183-204. ISSN 0166-4328.

540 Available at: < <https://pubmed.ncbi.nlm.nih.gov/11000420/> >.

541

542 [8] Tortorella S, Rodrigo-Angulo ML, Núñez A, Garzón M. Synaptic interactions between perifornical

543 lateral hypothalamic area, locus coeruleus nucleus and the oral pontine reticular nucleus are

544 implicated in the stage succession during sleep-wakefulness cycle. *Front Neurosci*, 2013, 7:216. ISSN  
545 1662-4548 (Print)  
546 1662-453X (Linking). Available at: < <https://www.ncbi.nlm.nih.gov/pubmed/24311996> >.  
547  
548 [9] Adamantidis A, Carter MC, De Lecea L. Optogenetic deconstruction of sleep-wake circuitry in the  
549 brain. *Front Mol Neurosci*, 2010, 2:31. ISSN 1662-5099 (Electronic)  
550 1662-5099 (Linking). Available at: < <https://www.ncbi.nlm.nih.gov/pubmed/20126433> >.  
551  
552 [10] Brown RE, Basheer R, McKenna JT, Strecker RE, McCarley RW. Control of sleep and  
553 wakefulness. *Physiol Rev*, 2012 Jul, 92(3):1087-1187,. ISSN 1522-1210 (Electronic)  
554 0031-9333 (Linking). Available at: < <https://www.ncbi.nlm.nih.gov/pubmed/22811426> >.  
555  
556 [11] Lee SH, Dan Y. Neuromodulation of brain states. *Neuron*, 2012 Oct, 76(1):209-222. ISSN 1097-  
557 4199 (Electronic)  
558 0896-6273 (Linking). Available at: < <https://www.ncbi.nlm.nih.gov/pubmed/23040816> >.  
559  
560 [12] Kroeger D, Absi G, Gagliardi C, Bandaru SS, Madara JC, Ferrari LL, et al. Galanin Neurons in the  
561 Ventrolateral Preoptic Area Promote Sleep and Heat Loss in Mice. *Nat Commun*, 2018 Oct, 9(1):4129.  
562 Available at: < <https://pubmed.ncbi.nlm.nih.gov/30297727> >.  
563  
564 [13] Zalocusky KA, Fenno L, Deisseroth K. Current challenges in optogenetics. In: (Ed.), 2013. p.23-  
565 33.  
566  
567 [14] Adamantidis A, Arber S, Bains JS, Bamberg E, Bonci A, Buzsáki G, et al. Optogenetics: 10 years  
568 after ChR2 in neurons--views from the community. *Nat Neurosci*, 2015 Sep, 18(9):1202-1212. ISSN  
569 1546-1726 (Electronic)  
570 1097-6256 (Linking). Available at: < <https://www.ncbi.nlm.nih.gov/pubmed/26308981> >.  
571  
572 [15] Hamani C, Florence G, Heinsen H, Plantinga BR, Temel Y, Uludag K, et al. Subthalamic Nucleus  
573 Deep Brain Stimulation: Basic Concepts and Novel Perspectives. *eNeuro*, 2017, 4(5):ENEURO.0140-  
574 17. ISSN 2373-2822 (Electronic)

575 2373-2822 (Linking). Available at: < <https://www.ncbi.nlm.nih.gov/pubmed/28966978> >.

576

577 [16] Tan SK, Vlamings R, Lim L, Sesia T, Janssen ML, Steinbusch HW, et al. Experimental deep brain  
578 stimulation in animal models. *Neurosurgery*, 2010 Oct, 67(4):1073-1080. ISSN 1524-4040 (Electronic)  
579 0148-396X (Linking). Available at: < <http://www.ncbi.nlm.nih.gov/pubmed/20881571> >.

580

581 [17] Noain D, Büchele F, Schreglmann SR, Valko PO, Gavrilov YV, Morawska MM, et al. Increased  
582 Sleep Need and Reduction of Tuberomammillary Histamine Neurons after Rodent Traumatic Brain  
583 Injury. *J Neurotrauma*, 2018 Jan, 35(1):85-93. ISSN 1557-9042 (Electronic)  
584 0897-7151 (Linking). Available at: < <https://www.ncbi.nlm.nih.gov/pubmed/28762870> >.

585

586 [18] Paxinos G, Watson C. The rat brain in stereotaxic coordinates. Compact 6th. Amsterdam: Elsevier  
587 Academic, 2009. 1 Band ISBN 978-0-12-374243-8 (spiral)  
588 0-12-374243-9 (spiral)  
589 978-0-12-374876-8 (CD-ROM).

590

591 [19] Miocinovic S, Lempka SF, Russo GS, Maks CB, Butson CR, Sakaie KE, et al. Experimental and  
592 theoretical characterization of the voltage distribution generated by deep brain stimulation. *Exp Neurol*,  
593 2009 Mar, 216(1):166-176. ISSN 1090-2430 (Electronic)  
594 0014-4886 (Linking). Available at: < <https://www.ncbi.nlm.nih.gov/pubmed/19118551> >.

595

596 [20] Gabriel S, Lau, RW, Gabriel C. The dielectric properties of biological tissues: II. Measurements in  
597 the frequency range 10 Hz to 20 GHz. *Phys Med Biol*, 1996 Nov, 41(11):2251-2269. ISSN 0031-9155  
598 (Print)  
599 0031-9155 (Linking). Available at: < <https://www.ncbi.nlm.nih.gov/pubmed/8938025> >.

600

601 [21] Imbach LL, Valko PO, Li T, Maric A, Symeonidou ER, Stover JF, et al. Increased Sleep Need and  
602 Daytime Sleepiness 6 Months After Traumatic Brain Injury: A Prospective Controlled Clinical Trial.  
603 *Brain*, 2015 Mar, 138(3):726-735.  
604 Available at: < <https://pubmed.ncbi.nlm.nih.gov/25595147> >.

605



606 [22] Deboer T. Sleep and sleep homeostasis in constant darkness in the rat. *Journal of Sleep*  
607 *Research*, 2009, 18: 357-364.  
608 Available at: < <https://doi.org/10.1111/j.1365-2869.2008.00728.x> >.  
609  
610 [23] Huber R, Deboer T and Tobler I. Effects of sleep deprivation on sleep and sleep EEG in three  
611 mouse strains: empirical data and simulations. *Brain Res.*, 2000, 857: 8–19  
612  
613 [24] Büchele F, Morawska MM, Schreglmann SR, Penner M, Muser M, Baumann CR, et al. Novel Rat  
614 Model of Weight Drop-Induced Closed Diffuse Traumatic Brain Injury Compatible with  
615 Electrophysiological Recordings of Vigilance States. *J Neurotrauma*, 2016 Jul, 33(13):1171-1180.  
616 ISSN 1557-9042 (Electronic)  
617 0897-7151 (Linking). Available at: < <https://www.ncbi.nlm.nih.gov/pubmed/26414556> >.  
618  
619 [25] Tobler I, Deboer T, Fischer M. Sleep and sleep regulation in normal and prion protein-deficient  
620 mice. *J Neurosci*, 1997 Mar, 17(5):1869-1879. ISSN 0270-6474 (Print)  
621 0270-6474 (Linking). Available at: < <https://www.ncbi.nlm.nih.gov/pubmed/9030645> >.  
622  
623 [26] Gallopin T, Luppi PH, Cauli B, Urade Y, Rossier J, Hayaishi O, Lambolez B, Fort P. The  
624 endogenous somnogen adenosine excites a subset of sleep-promoting neurons via A2A receptors in  
625 the ventrolateral preoptic nucleus. *Neuroscience*, 2005; 134(4):1377-90.  
626 Available at: doi: 10.1016/j.neuroscience.2005.05.045. PMID: 16039802.  
627  
628 [27] Alam A, Kumar S, McGinty D, Alam N, Szymusiak R, et al. Neuronal activity in the preoptic  
629 hypothalamus during sleep deprivation and recovery sleep. *J Neurophysiol*, 2014 Jan, 111(2):287-  
630 299. ISSN 1522-1598 (Electronic)  
631 0022-3077 (Linking). Available at: < <https://www.ncbi.nlm.nih.gov/pubmed/24174649> >.  
632  
633 [28] Aum DJ, Tierney TS. Deep brain stimulation: foundations and future trends. *Front Biosci*  
634 (Landmark Ed), 2018, 23:162-182. ISSN 1093-4715 (Electronic)  
635 1093-4715 (Linking). Available at: < <https://www.ncbi.nlm.nih.gov/pubmed/28930542> >.  
636

637 [29] Bilge MT, Gosai AK, Widge AS. Deep Brain Stimulation in Psychiatry: Mechanisms, Models, and  
638 Next-Generation Therapies. *Psychiatr Clin North Am*, 2018 Sep, 41(3):373-383. ISSN 1558-3147  
639 (Electronic)  
640 0193-953X (Linking). Available at: < <https://www.ncbi.nlm.nih.gov/pubmed/30098651> >.  
641  
642 [30] Nowak LG, Bullier J. Axons, but not cell bodies, are activated by electrical stimulation in cortical  
643 gray matter. I. Evidence from chronaxie measurements. *Exp Brain Res*, 1998 Feb a, 118(4):477-488.  
644 ISSN 0014-4819 (Print)  
645 0014-4819 (Linking). Available at: < <https://www.ncbi.nlm.nih.gov/pubmed/9504843> >.  
646  
647 [31] Nowak LG, Bullier J. Axons, but not cell bodies, are activated by electrical stimulation in cortical  
648 gray matter. II. Evidence from selective inactivation of cell bodies and axon initial segments. *Exp Brain*  
649 *Res*, 1998 Feb b, 118(4):489-500. ISSN 0014-4819 (Print)  
650 0014-4819 (Linking). Available at: < <https://www.ncbi.nlm.nih.gov/pubmed/9504844> >.  
651  
652 [32] Dostrovsky JO, Levy R, Wu JP, Hutchison WD, Tasker RR, Lozano AM. Microstimulation-induced  
653 inhibition of neuronal firing in human globus pallidus. *J Neurophysiol*, 2000 Jul, 84(1):570-574. ISSN  
654 0022-3077 (Print)  
655 0022-3077 (Linking). Available at: < <https://www.ncbi.nlm.nih.gov/pubmed/10899228> >.  
656  
657 [33] Hashimoto T, Elder CM, Okun MS, Patrick SK, Vitek JL. Stimulation of the subthalamic nucleus  
658 changes the firing pattern of pallidal neurons. *J Neurosci*, v. 23, n. 5, p. 1916-23, Mar 1 2003. ISSN  
659 1529-2401 (Electronic)  
660 0270-6474 (Linking). Available at: < <https://www.ncbi.nlm.nih.gov/pubmed/12629196> >.  
661  
662 [34] Anderson ME, Postupna N, Ruffo, M. Effects of high-frequency stimulation in the internal globus  
663 pallidus on the activity of thalamic neurons in the awake monkey. *J Neurophysiol*, v. 89, n. 2, p. 1150-  
664 60, Feb 2003. ISSN 0022-3077 (Print)  
665 0022-3077 (Linking). Available at: < <https://www.ncbi.nlm.nih.gov/pubmed/12574488> >.  
666

667 [35] Szymusiak R, Alam N, Steininger TL, McGinty D. Sleep-waking discharge patterns of ventrolateral  
668 preoptic/anterior hypothalamic neurons in rats. *Brain Res*, v. 803, n. 1-2, p. 178-88, Aug 24 1998.  
669 ISSN 0006-8993 (Print)  
670 0006-8993 (Linking). Available at: < <https://www.ncbi.nlm.nih.gov/pubmed/9729371> >.  
671  
672 [36] Blik V. Electric stimulation of the tuberomamillary nucleus affects epileptic activity and sleep–wake  
673 cycle in a genetic absence epilepsy model. *Epilepsy Research*, 2015, 109(C):119-125. ISSN 0920-  
674 1211. Available at: < <http://www.sciencedirect.com/science/article/pii/S0920121114002988> >.  
675  
676 [37] Agostinelli LJ, Ferrari LL, Mahoney CE, Mochizuki T, Lowell BB, Arrigoni E, Scammell TE.  
677 Descending projections from the basal forebrain to the orexin neurons in mice. *J Comp Neurol*, 2017  
678 May 1;525(7):1668-1684. doi:10.1002/cne.24158. Epub 2017 Feb 22. PMID: 27997037; PMCID:  
679 PMC5806522.  
680  
681 [38] Blanco-Centurion C, Liu M, Konadhode RP, Zhang X, Pelluru D, van den Pol AN, Shiromani PJ.  
682 Optogenetic activation of melanin-concentrating hormone neurons increases non-rapid eye movement  
683 and rapid eye movement sleep during the night in rats. *Eur J Neurosci*, v. 44, n. 10, p. 2846-2857, Nov  
684 2016. ISSN 1460-9568 (Electronic)  
685 0953-816X (Linking). Available at: < <https://www.ncbi.nlm.nih.gov/pubmed/27657541> >.  
686  
687 [39] Eggemann E, Bayer L, Serafin M, Saint-Mieux B, Bernheim L, Machard D, et al. The wake-  
688 promoting hypocretin-orexin neurons are in an intrinsic state of membrane depolarization. *J Neurosci*,  
689 2003 Mar, 23(5):1557-1562. ISSN 1529-2401 (Electronic)  
690 0270-6474 (Linking). Available at: < <https://www.ncbi.nlm.nih.gov/pubmed/12629156> >.  
691  
692 [40] van den Pol AN, Acuna-Goycolea C, Clark KR, Ghoshl PK. Physiological properties of  
693 hypothalamic MCH neurons identified with selective expression of reporter gene after recombinant  
694 virus infection. *Neuron*, 2004 May, 42(4):635-652. ISSN 0896-6273 (Print)  
695 0896-6273 (Linking). Available at: < <https://www.ncbi.nlm.nih.gov/pubmed/15157424> >.  
696

- 697 [41] Apergis-Schoute J, Iordanidou P, Faure C, Jegu S, Schöne C, Aitta-Aho T, Adamantidis A,  
698 Burdakov D. Optogenetic evidence for inhibitory signaling from orexin to MCH neurons via local  
699 microcircuits. *J Neurosci*, v. 35, n. 14, p. 5435-41, Apr 8 2015. ISSN 1529-2401 (Electronic)  
700 0270-6474 (Linking). Available at: < <https://www.ncbi.nlm.nih.gov/pubmed/25855162> >.  
701
- 702 [42] Gradinaru V. Expanding the brain researcher's toolkit. *Science*, 2020, 369(6504):637.  
703 Available at: doi: 10.1126/science.abd2660.  
704
- 705 [43] Grill WM, McIntyre CC. Extracellular excitation of central neurons: implications for the  
706 mechanisms of deep brain stimulation. *Thalamus & Related Systems*, 2001, 1(3):269-277. ISSN 1472-  
707 9288.  
708 Available at: < <http://www.sciencedirect.com/science/article/pii/S1472928801000255> >.  
709
- 710 [44] Li FW, Deurveilher S, Semba K. Behavioural and neuronal activation after microinjections of  
711 AMPA and NMDA into the perifornical lateral hypothalamus in rats. *Behav Brain Res*. 2011 Oct  
712 31;224(2):376-86. doi: 10.1016/j.bbr.2011.06.021. Epub 2011 Jun 24. PMID: 21723327.  
713 Available at: < <https://pubmed.ncbi.nlm.nih.gov/21723327/> >  
714
- 715 [45] Hassani OK, Lee MG, Jones BE. Melanin-concentrating hormone neurons discharge in a  
716 reciprocal manner to orexin neurons across the sleep-wake cycle. *Proc Natl Acad Sci U S A*, v. 106, n.  
717 7, p. 2418-22, Feb 17 2009. ISSN 1091-6490 (Electronic)  
718 0027-8424 (Linking). Available at: < <https://www.ncbi.nlm.nih.gov/pubmed/19188611> >.  
719
- 720 [46] Konadhode RR, Pelluru D, Shiromani PJ. Neurons containing orexin or melanin concentrating  
721 hormone reciprocally regulate wake and sleep. *Front Syst Neurosci*, 2014, 8:244. ISSN 1662-5137  
722 (Print)  
723 1662-5137 (Linking). Available at: < <https://www.ncbi.nlm.nih.gov/pubmed/25620917> >.  
724
- 725 [47] Ranck JB. Which elements are excited in electrical stimulation of mammalian central nervous  
726 system: a review. *Brain Res*, v. 98, n. 3, p. 417-40, Nov 21 1975. ISSN 0006-8993 (Print)  
727 0006-8993 (Linking). Available at: < <https://www.ncbi.nlm.nih.gov/pubmed/1102064> >.

**A**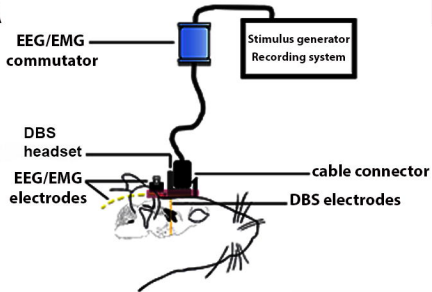**B**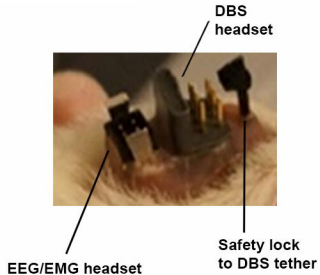

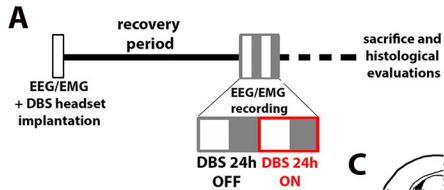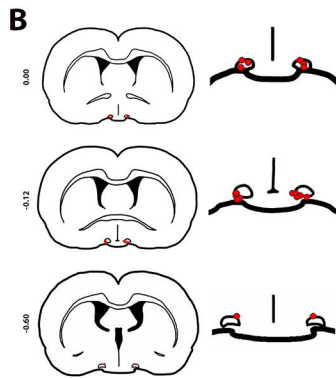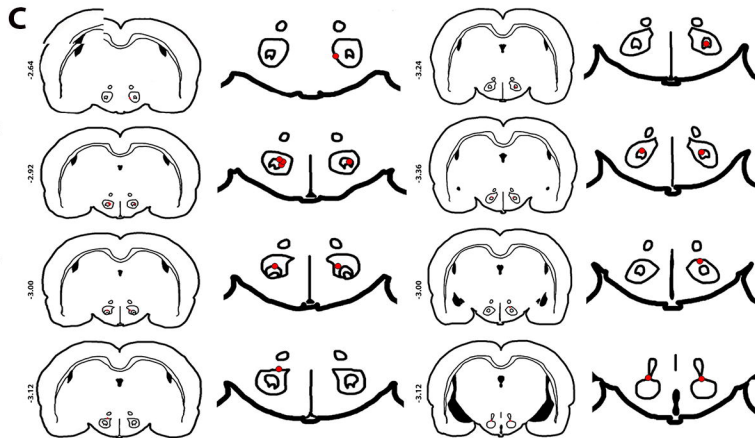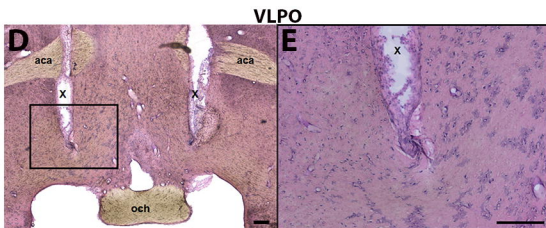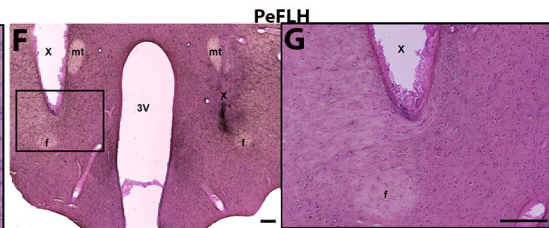

**A**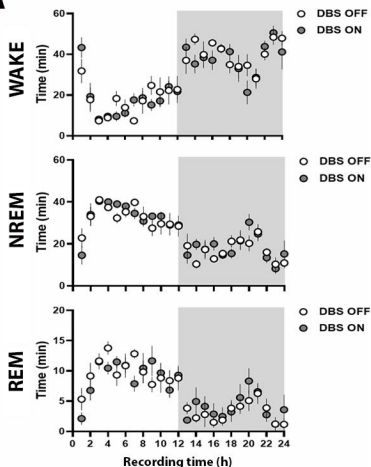**B**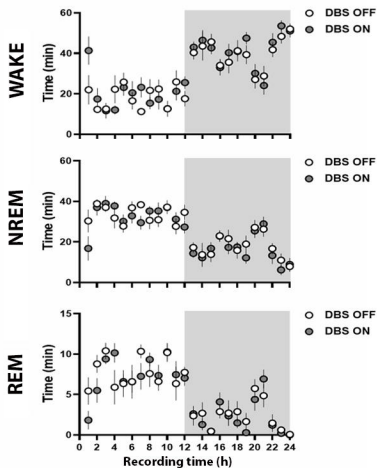**C**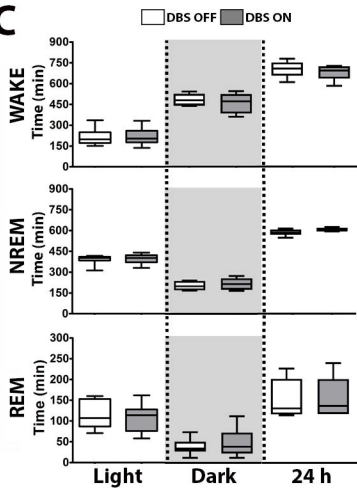**D**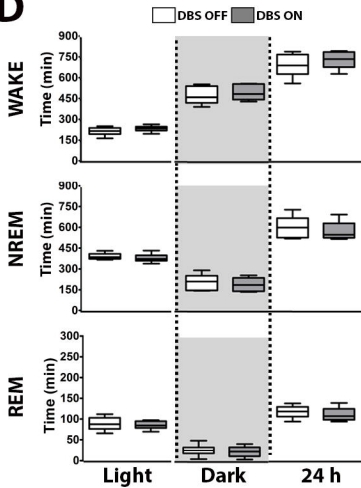

**A****WAKE**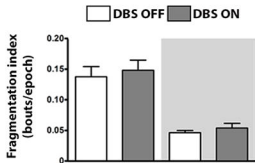**NREM**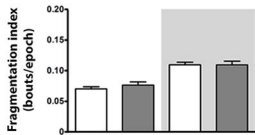**REM**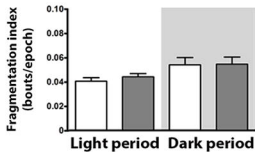**B**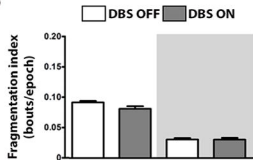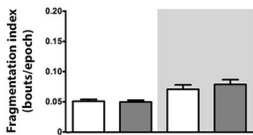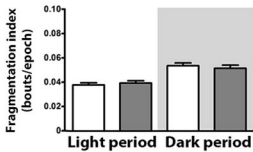



**A**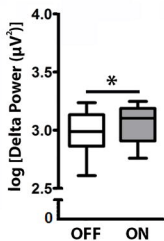**B**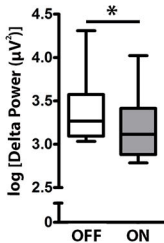**C**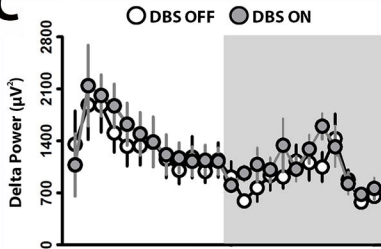**D**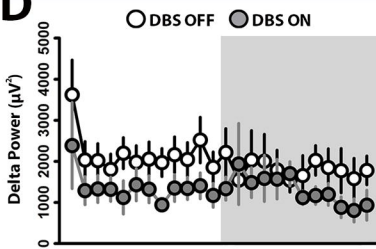**E**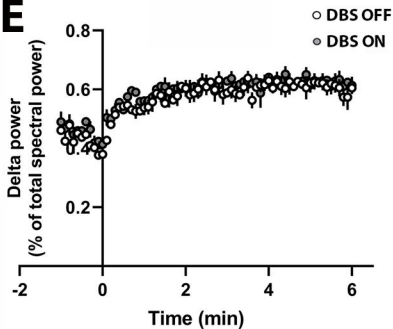**F**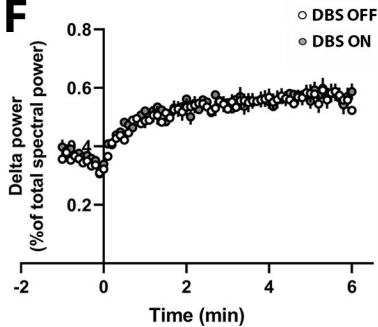

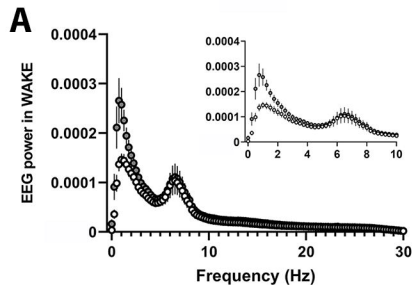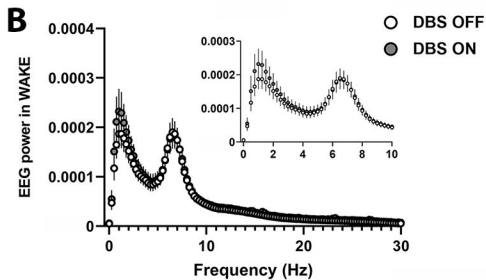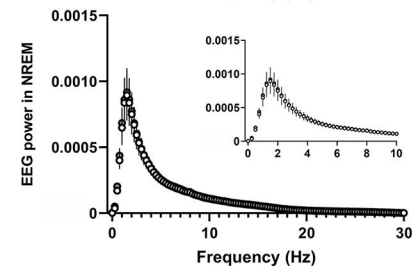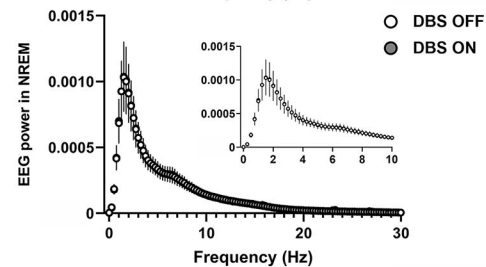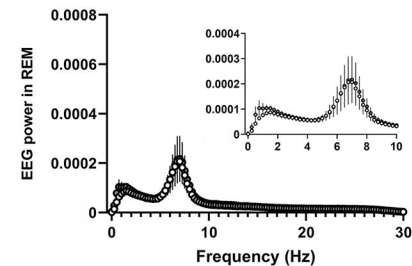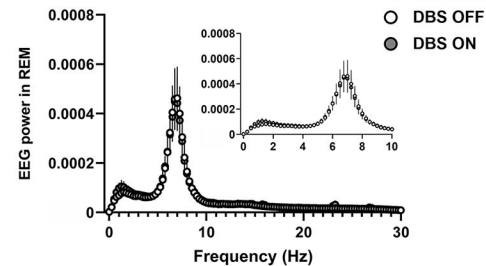

Source: https://www.biorxiv.org/content/10.1101/2021.08.11.455908v1.full.pdf
